# Supplementary material for: Protective Effect of Lactiplantibacillus plantarum 1201 Combined with Galactooligosaccharide on Carbon Tetrachloride-Induced Acute Liver Injury in Mice
Source: MDPI journal article supplement (doi:10.3390/nu13124441), 2021-12-12
Supplement: s1 [file s1]

## Supporting Information

Table S1 Primer sequences for quantitative Real-Time polymerase chain reaction.

| Gene                   |         | Sequence                |
|------------------------|---------|-------------------------|
| $\beta$ -actin         | Forward | GCTCCTCCTGAGCGCAAGTA    |
|                        | Reverse | CAGCTCAGTAACAGTCCGCC    |
| I $\kappa$ B- $\alpha$ | Forward | GAAGAGAAGCCGCTGACCAT    |
|                        | Reverse | CAGAAGTGCCTCAGCAATTCC   |
| NF- $\kappa$ B         | Forward | ACGATCTGTTTCCCCTCATC    |
|                        | Reverse | TGCTTCTCTCCCCAGGAATA    |
| IL-22                  | Forward | CCGAGGAGTCAGTGCTAAGG    |
|                        | Reverse | TCTGGATGTTCTGGTCGTCA    |
| IL-1 $\beta$           | Forward | ACAGGCTCCGAGATGAACAAC   |
|                        | Reverse | GTGGGTGTGCCGTCTTTCAT    |
| IL-6                   | Forward | CTGCAAGAGACTTCCATCCAG   |
|                        | Reverse | AGTGGTATAGACAGGTCTGTTGG |
| IFN- $\gamma$          | Forward | TGATTGCGGGGTTGTATCTG    |
|                        | Reverse | CTGTCTGGCCTGCTGTAA      |
| IL-17A                 | Forward | CTCCAGAAGGCCCTCAGACTA   |
|                        | Reverse | AGCTTTCCTCCGCATTGACA    |
| TNF- $\alpha$          | Forward | CCCTCACACTCAGATCATCTTCT |
|                        | Reverse | GCTACGACGTGGGCTACAG     |
| TGF- $\beta$ 1         | Forward | GTCAGTGGAGTTGTACGGCA    |
|                        | Reverse | TCATGTCATGGATGGTGCCC    |
| IL-10                  | Forward | GCTCTTACTGACTGGCATGAG   |
|                        | Reverse | CGCAGCTCTAGGAGCATGTG    |
| Ocln                   | Forward | GGACTGTCAACTCTTTCCGC    |
|                        | Reverse | CATTTATGATGAACAGCCCC    |
| Cldn3                  | Forward | CTGTCTGTCCTCTTCCAGCC    |
|                        | Reverse | CCACTACCAGCAGTCGATGA    |
| CCL4                   | Forward | GAAACAGCAGGAAGTGGGAG    |
|                        | Reverse | CATGAAGCTCTGCGTGTCTG    |
| CCL5                   | Forward | CCACTTCTTCTCTGGGTGG     |
|                        | Reverse | GTGCCCACGTCAAGGAGTAT    |
| FN-1                   | Forward | ATGAGAAGCCTGGATCCCCT    |
|                        | Reverse | GGAAGGGTAACCAGTTGGGG    |
| ZO-1                   | Forward | GATCCCTGTAAGTCACCCAGA   |
|                        | Reverse | CTCCCTGCTTGCACTCCTATC   |
